# Supplementary material for: Medicaid Managed Care and the Distribution of Societal Costs for Persons With Severe Mental Illness
Source: Atypon-hosted journal article supplement (doi:10.1176/appi.ajp.2007.06122089), 2008-01-16
Supplement: ajp_165_2_254_02.pdf [file ajp_165_2_254_02.pdf]

The material in this data supplement has not been peer reviewed.

---

**SAMHSA Managed Care Study**

**Service Utilization Survey**

---

## SERVICE UTILIZATION INTERVIEW PROTOCOL

**Directions:** Complete items 1 through 7 below. Prior to beginning the interview, spend time orienting the respondent to the time period covered by this interview. Use the calendar and mark the date of your last interview with them as well as today's date. Ask about and record other special events on the calendar such as birthdays and holidays to help frame the time period for the respondent. Then ask Question #1. If the answer to Question #1 is Yes, ask the questions indicated in columns A through H, recording your answers as shown in the example. Record each hospitalization or crisis stabilization unit visit on a separate line. When complete proceed to Question #2.

1.        
Subject ID Code

2. \_\_\_ / \_\_\_ / \_\_\_  
Date of Interview

3. \_\_\_\_\_  
Name of Interviewer

4. Method of Interview (Circle)

1 = Face-to-Face

2 = Telephone

3 = Mail

4 = Other (Specify) \_\_\_\_\_

5. From: \_\_\_ / \_\_\_ / \_\_\_ To: \_\_\_ / \_\_\_ / \_\_\_  
Period Covered by Interview

1. Since the last time you were interviewed on (\_\_\_\_), have you been hospitalized or gone to a crisis stabilization unit for any reason?

| Column A                                                                                                                                                                                                                                                      | Column B                                                                                                                                                                                                                                                                          |                                      | Column C                                                                                                  | Column D                                                                                                                                                                                                                                                                                                                                                             |             | Column E                                                                                                                                                                                                                                                  | Column F                                                                                                                                                                                                                                             |
|---------------------------------------------------------------------------------------------------------------------------------------------------------------------------------------------------------------------------------------------------------------|-----------------------------------------------------------------------------------------------------------------------------------------------------------------------------------------------------------------------------------------------------------------------------------|--------------------------------------|-----------------------------------------------------------------------------------------------------------|----------------------------------------------------------------------------------------------------------------------------------------------------------------------------------------------------------------------------------------------------------------------------------------------------------------------------------------------------------------------|-------------|-----------------------------------------------------------------------------------------------------------------------------------------------------------------------------------------------------------------------------------------------------------|------------------------------------------------------------------------------------------------------------------------------------------------------------------------------------------------------------------------------------------------------|
| <p><b>What were the reasons you were in the hospital or crisis stabilization unit? [Code all that apply]</b></p> <p>1 = Medical<br/>2 = Mental Health<br/>3 = Alcohol/Drug Abuse<br/>4 = Other (Specify)<br/>8 = NA - Not Hospitalized<br/>9 = Don't Know</p> | <p><b>Where were you hospitalized or in a crisis stabilization unit? [Record name of hospital or crisis stabilization unit, include city and state if outside the Tampa or Jacksonville Area. Codes for this question will be developed over time.]</b></p> <p>9 = Don't Know</p> |                                      | <p><b>How many days were you in the hospital or crisis stabilization unit? [Enter number of days]</b></p> | <p><b>How did you get to and from the hospital or crisis stabilization unit? [Enter code]</b></p> <p>0 = Police<br/>1 = Ambulance<br/>2 = Medicaid cab<br/>3 = Regular cab<br/>4 = Own car<br/>5 = Relative or Friend's car<br/>6 = Bus<br/>7 = Walked /Bike<br/>8 = Other (Specify)<br/>9 = Don't Know<br/>55=Caretaker's vehicle<br/>66=Special comm transport</p> |             | <p><b>Did you or your family have to pay anything out-of-pocket for this service?</b></p> <p>0 = No<br/>9 = Don't Know</p> <p>If yes, how much did you have to pay? [Enter amount in dollars or 1 =Yes if respondent does not know the dollar amount]</p> | <p><b>Who do you think will pay the bill?</b></p> <p>0 = No one, still owe money<br/>1 = respondent<br/>2 = relative or spouse<br/>3 = friend<br/>4 = case manager or provider<br/>5 = Other (Specify)<br/>8 = Not Applicable<br/>9 = Don't Know</p> |
|                                                                                                                                                                                                                                                               | <b>Code</b>                                                                                                                                                                                                                                                                       | <b>Facility name, city and state</b> |                                                                                                           | <b>TO</b>                                                                                                                                                                                                                                                                                                                                                            | <b>FROM</b> |                                                                                                                                                                                                                                                           |                                                                                                                                                                                                                                                      |
| <i>Example: 1 &amp; 3</i>                                                                                                                                                                                                                                     | ?                                                                                                                                                                                                                                                                                 | <i>Tampa General Hospital</i>        | <i>3 days</i>                                                                                             | <i>5</i>                                                                                                                                                                                                                                                                                                                                                             |             | <i>9</i>                                                                                                                                                                                                                                                  | <i>9</i>                                                                                                                                                                                                                                             |
|                                                                                                                                                                                                                                                               |                                                                                                                                                                                                                                                                                   |                                      |                                                                                                           |                                                                                                                                                                                                                                                                                                                                                                      |             |                                                                                                                                                                                                                                                           |                                                                                                                                                                                                                                                      |
|                                                                                                                                                                                                                                                               |                                                                                                                                                                                                                                                                                   |                                      |                                                                                                           |                                                                                                                                                                                                                                                                                                                                                                      |             |                                                                                                                                                                                                                                                           |                                                                                                                                                                                                                                                      |
|                                                                                                                                                                                                                                                               |                                                                                                                                                                                                                                                                                   |                                      |                                                                                                           |                                                                                                                                                                                                                                                                                                                                                                      |             |                                                                                                                                                                                                                                                           |                                                                                                                                                                                                                                                      |







**4. Now I would like to find out about any other kinds of services you may have used or received if only just once since the last time you were interviewed on (     Date     ). We have some lists to help you remember everything. Other than the things we have already talked about, have you used any other type of **medical or physical health services** since our last interview? Tell me even if it is not listed on the card. *[Respondent should be looking at response card 4a. If the answer to Question #4a is Yes, ask the questions indicated in columns A through H, recording your answers as shown in the example. Record each different medical service the respondent used or received on a separate line. When complete, proceed to Question #4b]***

**1. Medical Services**

|                                                |                                        |                               |                                                             |
|------------------------------------------------|----------------------------------------|-------------------------------|-------------------------------------------------------------|
| 1 = had an evaluation, assessment, or check-up | 5 = had a blood test                   | 9 = use chiropractic services | 13 = purchased medical supplies like crutches, braces, etc. |
| 2 = got a prescription written                 | 6 = had a diagnostic test              | 10 = had a medical procedure  | 14 =                                                        |
| 3 = got a prescription filled or refilled      | 7 = had X-rays, MRI, or CAT scan       | 11 = got acupuncture          | 15 =                                                        |
| 4 = bought over-the-counter medicine           | 8 = had an emergency visit to a doctor | 12 = had allergy or flu shots | 16 =                                                        |

**Since the last time you were interviewed on (     Date     ) have you used any type of mental health services?** *[Make sure respondent is looking at Response Card 4b]*

**2. Mental Health Services**

|                                                |                                                 |                                             |                                            |
|------------------------------------------------|-------------------------------------------------|---------------------------------------------|--------------------------------------------|
| 1 = had an evaluation, assessment, or check-up | 5 = had medication adjustment                   | 9 = called a crisis or support line         | 13 = went to DMDA or other self-help group |
| 2 = got a prescription written                 | 6 = received medication management              | 10 = used an Internet support group/chat    | 14 =                                       |
| 3 = got a prescription filled or refilled      | 7 = had counseling other than "therapy"         | 11 = got acupuncture                        | 15 = General Case Management services      |
| 4 = bought over-the-counter medicine           | 8 = received case management visits or services | 12 = went to a club-house or drop-in center | 16 =                                       |

**Since the last time you were interviewed on (     Date     ) have you used any alcohol or drug services?** *[Make sure respondent is looking at Response Card 4c]*

**3. Alcohol or Drug Services**

|                                                |                                                                   |                                     |      |
|------------------------------------------------|-------------------------------------------------------------------|-------------------------------------|------|
| 1 = had an evaluation, assessment, or check-up | 5 = went to AA/CA/NA, rational recovery, other self-help meetings | 9 = called a crisis or support line | 13 = |
| 2 = got prescription written                   | 6 = went to an alcohol/drug class with an instructor              | 10 = got AA/CA/NA sponsor           | 14 = |
| 3 = got a prescription filled or refilled      | 7 = got acupuncture                                               | 11 = church support or counseling   | 15 = |
| 4 = bought over-the-counter medicine           | 8 = received biofeedback                                          | 12 =                                | 16 = |

Since the last time you were interviewed on (     Date     ) have you used any dental, eye care, or hearing services? *[Make sure respondent is looking at Response Card 4d]*

#### 4. Dental, Eye Care, & Hearing Services

|                                                            |                                                     |                       |      |
|------------------------------------------------------------|-----------------------------------------------------|-----------------------|------|
| 1 = had your teeth cleaned                                 | 5 = got a prescription written, filled, or refilled | 9 = had eye surgery   | 13 = |
| 2 = had fillings, tooth pulled, or other dental procedures | 6 = bought over-the-counter medicine                | 10 = had ears cleaned | 14 = |
| 3 = got fitted for dentures or braces                      | 7 = had your eyes examined                          | 11 = got acupuncture  | 15 = |
| 4 = had dental surgery                                     | 8 = got eye glasses, contact lens, or hearing aids  | 12 =                  | 16 = |

Since the last time you were interviewed on (     Date     ) have you received any educational, vocational, or other work-related services? *[Make sure respondent is looking at Response Card 4e]*

#### 5. Educational & Vocational Services

|                                       |                                        |                                      |      |
|---------------------------------------|----------------------------------------|--------------------------------------|------|
| 1 = attended college, school, classes | 5 = received job counseling or testing | 9 = attended interviewing classes .  | 13 = |
| 2 = received job skills training      | 6 = worked regularly for pay           | 10 = attended resume writing classes | 14 = |
| 3 = gotten volunteer experience       | 7 = worked occasionally, odd jobs      | 11 =                                 | 15 = |
| 4 = on-the-job training or experience | 8 = received occupational therapy      | 12 =                                 | 16 = |

Since the last time you were interviewed on (     Date     ) have you had any help with daily living needs like someone cooking or cleaning for you? *[Make sure respondent is looking at Response Card 4f]*

#### 6. Daily Living Services

|                                              |                                                              |      |      |
|----------------------------------------------|--------------------------------------------------------------|------|------|
| 1 = someone cleaned or cooked for you        | 5 = attended special social or recreational events           | 9 =  | 13 = |
| 2 = someone doing maintenance work for you   | 6 = someone helped you get to church or to visit your family | 10 = | 14 = |
| 3 = someone help you with shopping           | 7 =                                                          | 11 = | 15 = |
| 4 = someone helped you remember appointments | 8 =                                                          | 12 = | 16 = |

Since the last time you were interviewed on (     Date     ) have you used any legal services or been in contact with the police or courts? [Make sure respondent is looking at Response Card 4g]

### 7. Legal & Court-related Services

|                                          |                                          |                                                      |      |
|------------------------------------------|------------------------------------------|------------------------------------------------------|------|
| 1 = been a victim of a crime             | 5 = spent time in jail                   | 9 = was transported by the police or fire department | 13 = |
| 2 = consulted with a lawyer or legal aid | 6 = met with a probation/parole officer  | 10 = called the police or fire department            | 14 = |
| 3 = had contact with the police          | 7 = appeared in court                    | 11 =                                                 | 15 = |
| 4 = was arrested                         | 8 = did court required community service | 12 =                                                 | 16 = |

Since the last time you were interviewed on (     Date     ) have you had any help with basic needs like getting food, meals or clothing for you? [Make sure respondent is looking at Response Card 4h]

### 8. Basic Needs

|                                            |                                       |                        |      |
|--------------------------------------------|---------------------------------------|------------------------|------|
| 1 = went to a food pantry                  | 5 = got government surplus food       | 9 = free toys or gifts | 13 = |
| 2 = ate at a soup kitchen                  | 6 = stayed at a shelter               | 10 =                   | 14 = |
| 3 = got free clothing                      | 7 = assistance with utilities         | 11 =                   | 15 = |
| 4 = got free household items or furnishing | 8 = cash or voucher from church, etc. | 12 =                   | 16 = |

Since the last time you were interviewed on (     Date     ) have you used or receive any social services? [Make sure respondent is looking at Response Card 4i]

### 9. Social Services

|                                                                |                                              |                                                   |      |
|----------------------------------------------------------------|----------------------------------------------|---------------------------------------------------|------|
| 1 = Medicaid application/reapplication                         | 5 = payee or guardian services               | 9 = received adult protection services            | 13 = |
| 2 = Food stamp application/reapplication                       | 6 = met with a probation/parole officer      | 10 = received help for domestic violence          | 14 = |
| 3 = public assistance application/reapplication                | 7 = visit by a case manager or social worker | 11 = received family preservation services        | 15 = |
| 4 = application, reapplication or appeal for disability income | 8 = received child protection services       | 12 = received employment or unemployment services | 16 = |



Since the last time you were interviewed on (\_\_\_Date\_\_\_) have you gotten any other kinds of help that might have had some effect on your health or living situation? *[Make sure respondent is looking at Response Card 4j]*

**10. Other Services**

|                                                    |                                        |                                                          |      |
|----------------------------------------------------|----------------------------------------|----------------------------------------------------------|------|
| 1 = help or support from a friend or family member | 5 = reduced cost bus pass              | 9 = special foods or herbs for healing                   | 13 = |
| 2 = Sweat lodge or healing ceremony                | 6 = help managing your money           | 10 = practiced meditation                                | 14 = |
| 3 = Internet or on-line support groups             | 7 = help from an advocate              | 11 = special help from community organizations or groups | 15 = |
| 4 = spiritual advice or counseling                 | 8 = help from a church or church group | 12 = used aroma therapy                                  | 16 = |





5a. Has your living situation change since the last time you were interviewed on (     Date     )?          Yes          No

5b. Since your last interview, have you spent time in any of the following living situations? [Note: Hospitalizations or residential treatments listed on log A do not need to be listed here, please read each living situation to respondent]

     # of Days

     Living Situation

         

1a. Skilled nursing facility - 24 hour staff

1b. (Name) \_\_\_\_\_

         

2a. Intermediate care facility < 24 hour staff

2b. (Name) \_\_\_\_\_

         

3a. Transitional group home

3b. (Name) \_\_\_\_\_

         

4a. Family foster care

4b. (Name) \_\_\_\_\_

         

5a. Coop apart with staff on-site

5b. (Name) \_\_\_\_\_

         

6a. Coop apartment - no staff

6b. (Name) \_\_\_\_\_

         

7a. Board & care homes, with programs & supervision

7b. (Name) \_\_\_\_\_

         

8a. Boarding house (no program or supervision)

8b. (Name) \_\_\_\_\_

         

9a. Rooming house

9b. Total cost/mo with utilities?               

9c. YOUR share/mo?               

         

10a. Pvt house or apart.

10b. Total cost/mo with utilities?               

10c. YOUR share/mo?               

         

11a. Shelter or mission

11b. (Name) \_\_\_\_\_

11c. YOUR cost/mo?               

         

12a. Jail

12b. (Name) \_\_\_\_\_

         

13a. None - streets, missions, etc.

13c. YOUR cost/mo ?               

         

14a. Other (Specify) \_\_\_\_\_ ?

14c. YOUR cost/mo?               

15a. How much, if anything, does anyone else pay for your rent or place to live per month?               

15b. Who pays this? [Circle]

1 = family member

2 = spouse

3 = friend

4 = service provider

5 = other (Specify) \_\_\_\_\_

16. Who else lives with you as a roommate (group home, rooming house etc.) or as a member of the household?

\_\_\_\_\_

6a. Has there been any change in your sources of income since the last time you were interviewed on (\_\_\_Date\_\_\_)? \_\_\_\_\_ Yes \_\_\_\_\_ No \_\_\_\_\_ DK

6b. What is the amount of money or support you have received since (\_\_\_Date\_\_\_), from each of the following sources? [Enter the amount in dollars, per month Enter 8, if respondent does not know.]

- a. \$ \_\_\_\_\_ Paid employment (post-tax take home pay)
- b. \$ \_\_\_\_\_ Social Welfare benefits - state or county (general welfare/public aid, food stamps), TANF (Temporary Aid to Needy Families), formerly AFDC (Aid to Families with Dependent Children)
- c. \$ \_\_\_\_\_ Supplemental Security Income (SSI)
- d. \$ \_\_\_\_\_ Social Security Disability Income (SSDI)
- e. \$ \_\_\_\_\_ VA or other armed services disability benefits
- f. \$ \_\_\_\_\_ VA or other armed services pension
- g. \$ \_\_\_\_\_ Unemployment compensation
- h. \$ \_\_\_\_\_ Social Security Retirement Benefits (SSA)
- i. \$ \_\_\_\_\_ Retirement pension, benefits, investment, or savings income (only if receive regular payments)
- j. \$ \_\_\_\_\_ Alimony and child support
- k. \$ \_\_\_\_\_ Mate, family or friends
- l. \$ \_\_\_\_\_ Illegal
- m. \$ \_\_\_\_\_ Other (Specify) \_\_\_\_\_

7. **What is your current health plan?**

**Tampa**

- Medipass/Florida Health Partnership
- PCA Family Plan
- PHP Physicians Health Plan
- Ultramedix Health Plan
- Stay Well/Well Care Health Plan
- First Florida Health Plan
- Healthease/Tampa General Health Plan
- St. Augustine Health Care
- Don't Know
- Other (Please Specify) \_\_\_\_\_

**Jacksonville**

- Medipass (Plain Medicaid)
- PCA Family Plan
- Foundation Health - A Foundation Health Plan, Inc.
- United Health Care of Florida
- Health Care USA, Inc.
- Champion Health Care
- Discovery
- Don't Know
- Other (Please Specify) \_\_\_\_\_

**Notes and Comments** *[Please record any information on respondents service utilization not obtained by the previous questions or any comments about the service utilization questionnaire that would help revise and improve its utility].*

The material in this data supplement has not been peer reviewed.
